# Supplementary material for: Cu@Ni core–shell nanoparticles/reduced graphene oxide nanocomposites for nonenzymatic glucose sensor
Source: Royal Society of Chemistry journal article supplement (doi:10.1039/c7ra00910k), 2017-01-01
Supplement: c7ra00910k1.pdf [file c7ra00910k1.pdf]

**Electronic Supplementary Information (ESI) for**

**Cu@Ni core-shell nanoparticles/reduced graphene oxide  
nanocomposites for nonenzymatic glucose sensor†**

Kong-Lin Wu,<sup>a\*</sup> Ya-Miao Cai,<sup>a</sup> Bin-Bin Jiang,<sup>b</sup> Weng-Chon Cheong,<sup>c</sup> Xian-Wen

Wei,<sup>a\*</sup> Weizhi Wang<sup>a</sup> and Nan Yu<sup>a</sup>

<sup>a</sup> *College of Chemistry and Materials Science, Key Laboratory of Functional Molecular Solids, the Ministry of Education, Anhui Laboratory of Molecule-based Materials, Anhui Key Laboratory of Functional Molecular Solids, Anhui Normal University, Wuhu 241000, China.*

<sup>b</sup> *School of Chemical and Engineering, Anhui University of Technology, Maanshan 243002, China.*

<sup>c</sup> *Department of Chemistry, Tsinghua University, Beijing 100084, China.*

**Corresponding author:**

*E-mail: konglin@mail.ahnu.edu.cn (K.-L. Wu); xwwei@mail.ahnu.edu.cn (X.-W. Wei)*

*Tel & Fax: +86 553 3869303.*

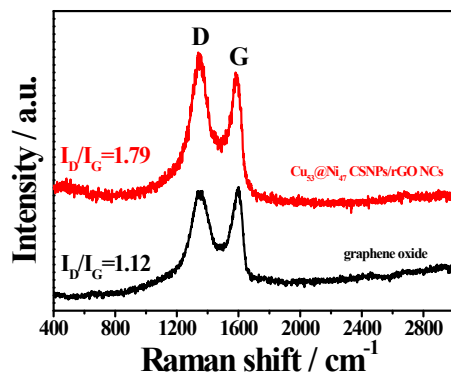

**Fig. S1** Raman spectra of graphene oxide (black line) and  $\text{Cu}_{53}@Ni_{47}$  CSNPs/rGO NCs (red line).

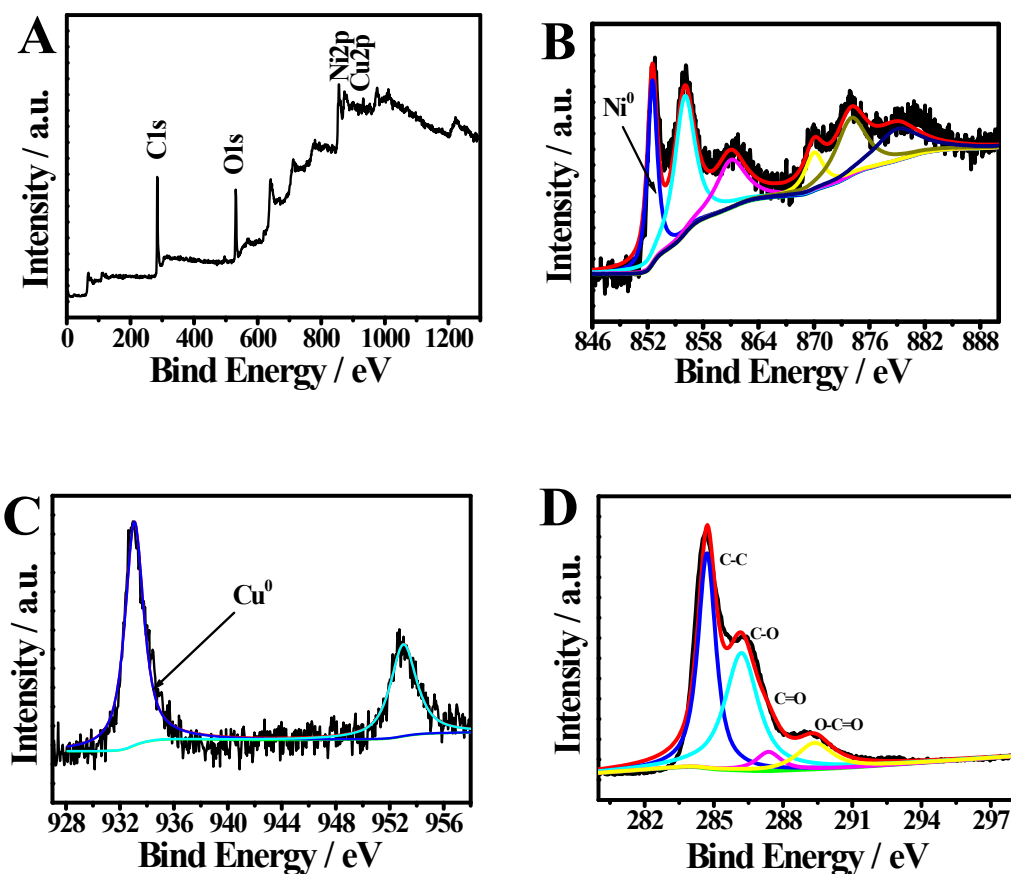

**Fig. S2** XPS spectra of  $\text{Cu}_{53}@Ni_{47}$  CSNPs/rGO NCs: (a) survey spectrum, (b) Ni2p region, (c) Cu2p region, and (d) C1s region, respectively.

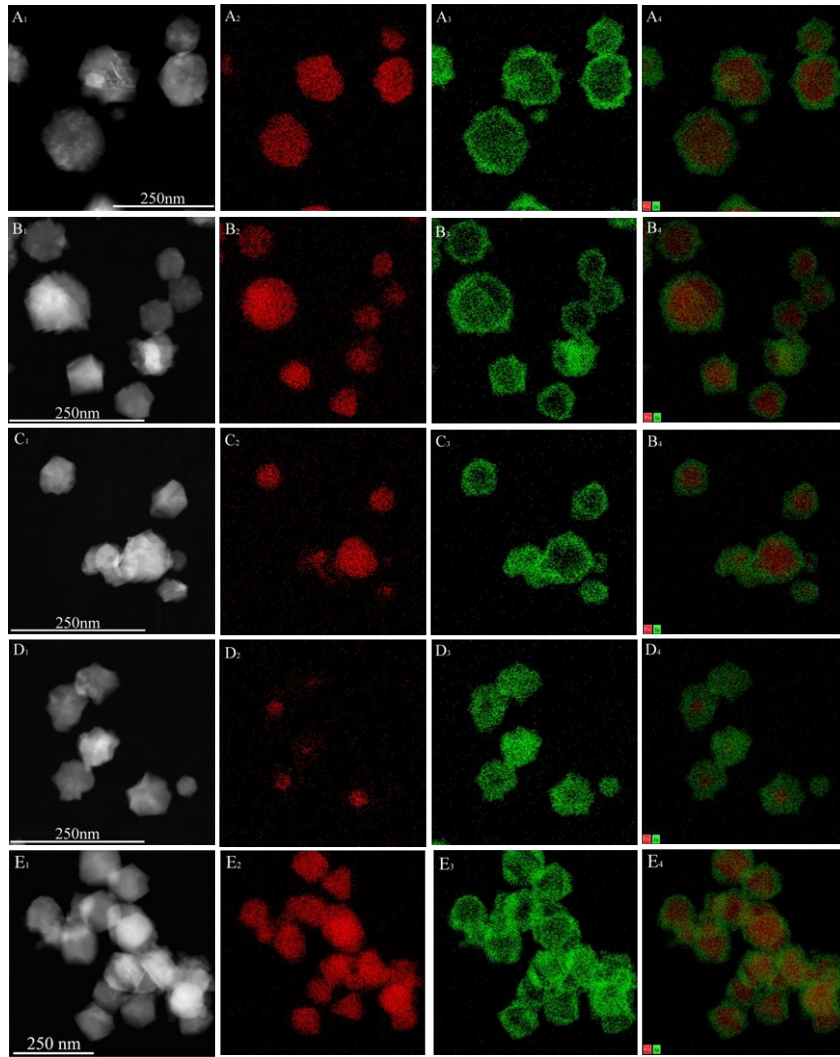

**Fig. S3** STEM-HAADF image ( $A_1$ – $E_1$ ), STEM-EDX maps in Cu  $K\alpha_1$  signals ( $A_2$ – $E_2$ ) and Ni  $K\alpha_1$  signals ( $A_3$ – $E_3$ ), and overall map ( $A_4$ – $E_4$ ) for  $Cu_{70}@Ni_{30}$  CSNPs/rGO NCs (A),  $Cu_{63}@Ni_{37}$  CSNPs/rGO NCs (B),  $Cu_{38}@Ni_{62}$  CSNPs/rGO NCs (C),  $Cu_{21}@Ni_{79}$  CSNPs/rGO NCs (D), and  $Cu_{52}@Ni_{48}$  CSNPs (E), respectively.

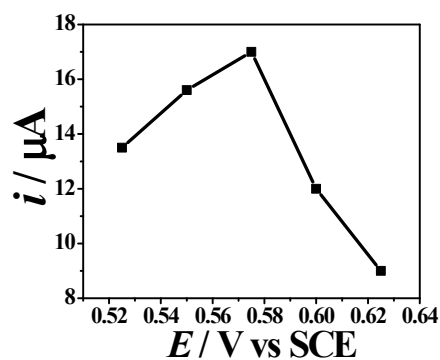

**Fig. S4** Effect of the applied potential on peak current to 0.5 mM glucose for  $\text{Cu}_{53}\text{@Ni}_{47}$  CSNPs/rGO/Nafion/GCE.

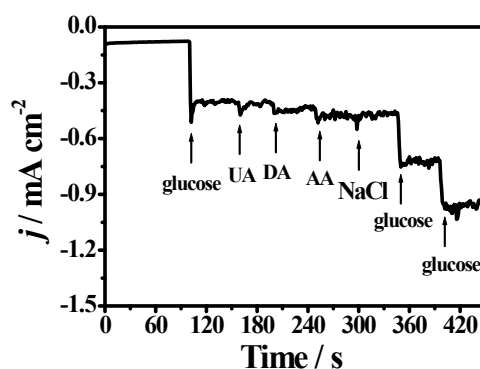

**Fig. S5** Amperometric response of the  $\text{Cu}_{53}\text{@Ni}_{47}$  CSNPs/rGO/Nafion/GCE with successive addition of 0.5 mM glucose, 0.1 mM UA, 0.1 mM DA, 0.1 mM AA, and 0.1 mM NaCl in 0.1 M NaOH solution at +0.575 V, respectively.

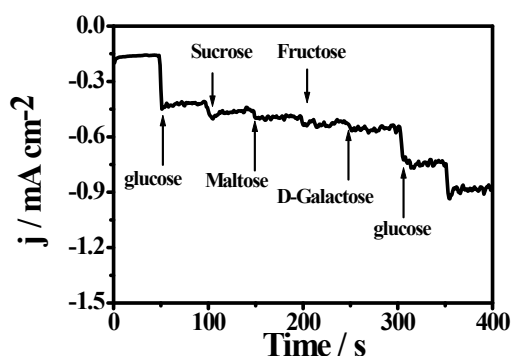

**Fig. S6** Amperometric response of the  $\text{Cu}_{53}\text{@Ni}_{47}$  CSNPs/rGO/Nafion/GCE with successive addition of 0.5 mM glucose, 0.1 mM sucrose, 0.1 mM maltose, 0.1 mM fructose, 0.1 mM D-galactose, 0.5 mM glucose in 0.1 M NaOH solution at +0.575 V, respectively.

**Table S1**

Molar ratio of Cu/Ni and quality ratio of  $\text{Cu}_x\text{@Ni}_{100-x}$  to rGO sheets in each  $\text{Cu}_x\text{@Ni}_{100-x}$  CSNPs/rGO NCs are determined by ICP-AES analysis.

| Initial composition                            | Final composition                          | Quality ratio of $\text{Cu}_x\text{@Ni}_{100-x}$ to rGO sheets |
|------------------------------------------------|--------------------------------------------|----------------------------------------------------------------|
| $\text{Cu}_{50}\text{@Ni}_{50}$                | $\text{Cu}_{52}\text{@Ni}_{48}$            | –                                                              |
| $\text{Cu}_{75}\text{@Ni}_{25}/\text{rGO}$     | $\text{Cu}_{70}\text{@Ni}_{30}/\text{rGO}$ | 2.83:1                                                         |
| $\text{Cu}_{66.7}\text{@Ni}_{33.3}/\text{rGO}$ | $\text{Cu}_{63}\text{@Ni}_{37}/\text{rGO}$ | 2.91:1                                                         |
| $\text{Cu}_{50}\text{@Ni}_{50}/\text{rGO}$     | $\text{Cu}_{53}\text{@Ni}_{47}/\text{rGO}$ | 3.02:1                                                         |
| $\text{Cu}_{33.3}\text{@Ni}_{66.7}/\text{rGO}$ | $\text{Cu}_{38}\text{@Ni}_{62}/\text{rGO}$ | 3.00:1                                                         |
| $\text{Cu}_{25}\text{@Ni}_{75}/\text{rGO}$     | $\text{Cu}_{20}\text{@Ni}_{80}/\text{rGO}$ | 2.85:1                                                         |

**Table S2**

Net current contribution for glucose oxidation using  $\text{Cu}_x\text{@Ni}_{100-x}$  CSNPs/rGO NCs with different final Cu: Ni molar ratios in NCs.

| Cu: Ni | Net current ( $\mu\text{A}$ ) |
|--------|-------------------------------|
| 70: 30 | 3                             |
| 63: 37 | 19                            |
| 53: 47 | 23                            |
| 38: 62 | 13                            |
| 20: 80 | 11                            |
